# Supplementary material
Source: PubMed Central journal article supplement (PMC4496618)
Supplement: IAI.00416-15_zii999091340so1.pdf [file IAI.00416-15_zii999091340so1.pdf]

## Supporting information

Fig. S1

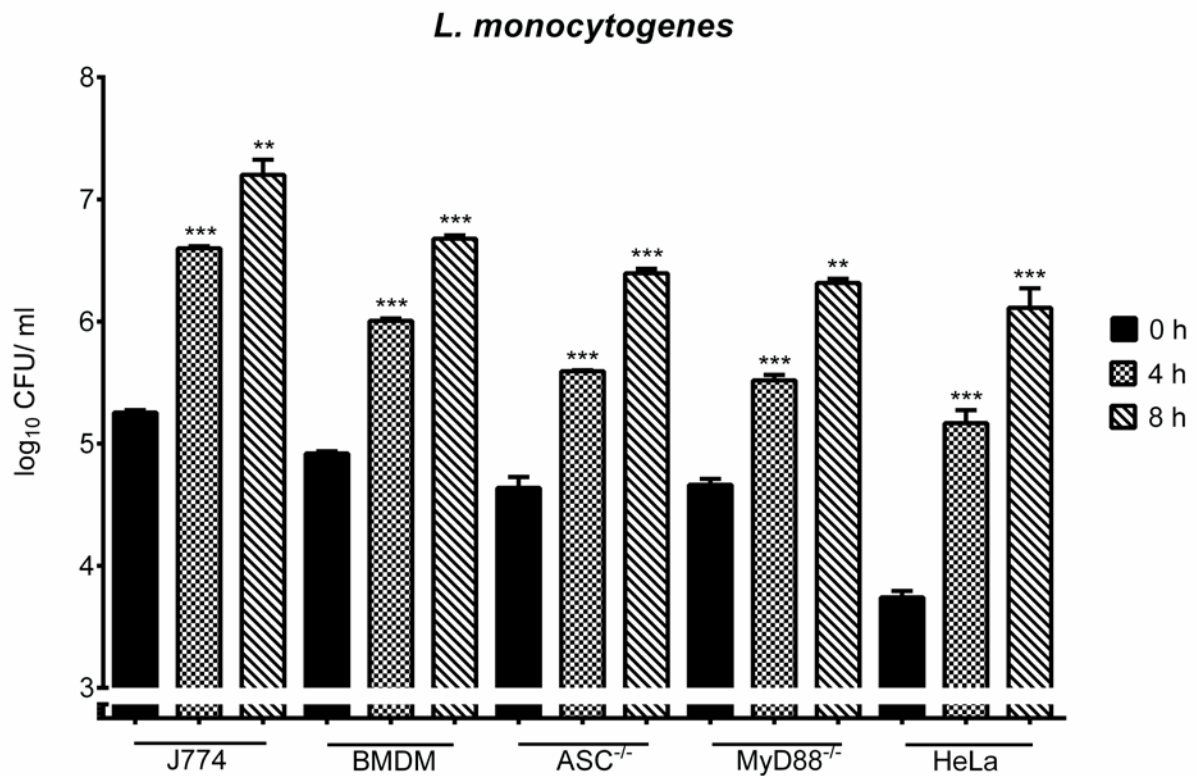

**Fig. S1.** Intracellular replication of *L. monocytogenes* in various cell types. The bars indicate mean values of log<sub>10</sub> CFU/ml and the error bars the SD. All experiments were performed at least two times with triplicate or duplicate data sets, of which one representative experiment is shown. Asterisks indicate significant differences between bacterial numbers in the respective cell type for the 4 or 8 h time point vs. the 0 h time point, as determined by a 2-sided *t* test with equal variance (\*\*  $P \leq 0.01$ ; \*\*\*  $P \leq 0.001$ ).

Fig. S2

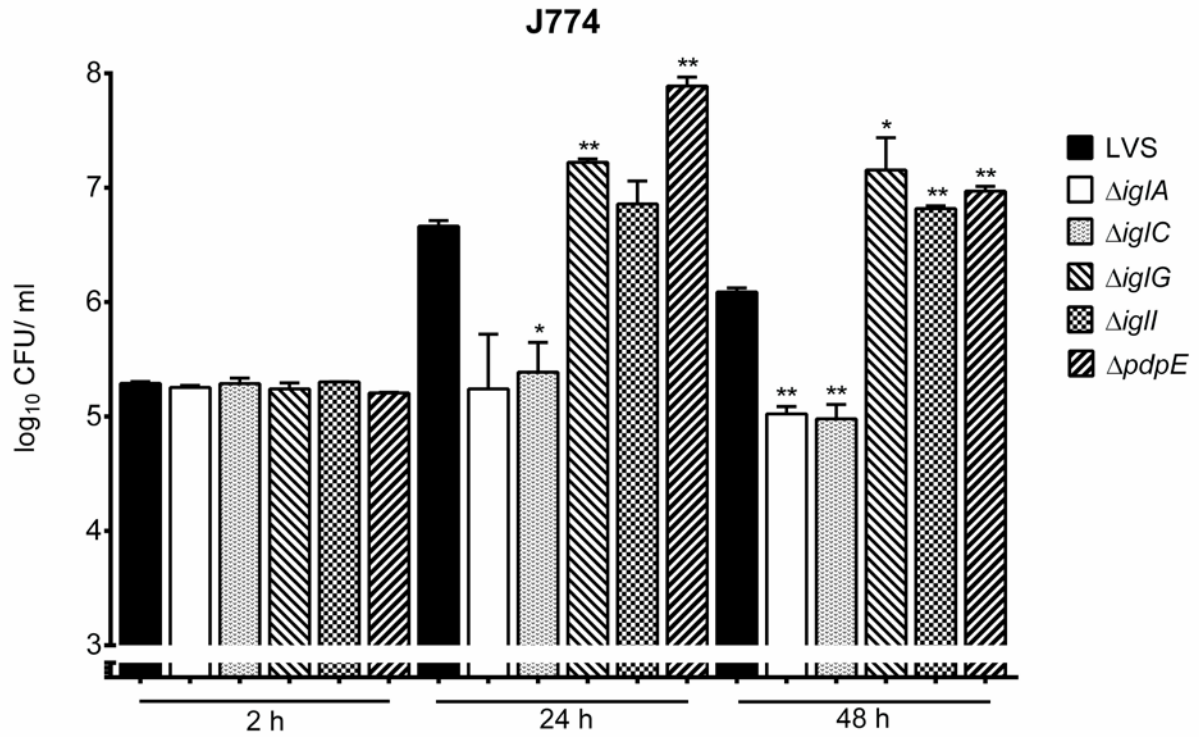

13

14

15 **Fig. S2.** Intracellular replication of indicated *F. tularensis* strains in J774 cells. The bars indicate mean  
 16 values of log<sub>10</sub> CFU/ml and the error bars the SD. Experiments were performed two times with  
 17 triplicate or duplicate data sets, of which one representative experiment is shown. Asterisks indicate  
 18 a significant difference between the log<sub>10</sub> number of the CFU of the mutant in comparison to the  
 19 parental strain LVS, as determined by a 2-sided *t* test with equal variance (\*  $P \leq 0.05$ ; \*\*  $P \leq 0.01$ ).

20

Fig. S3

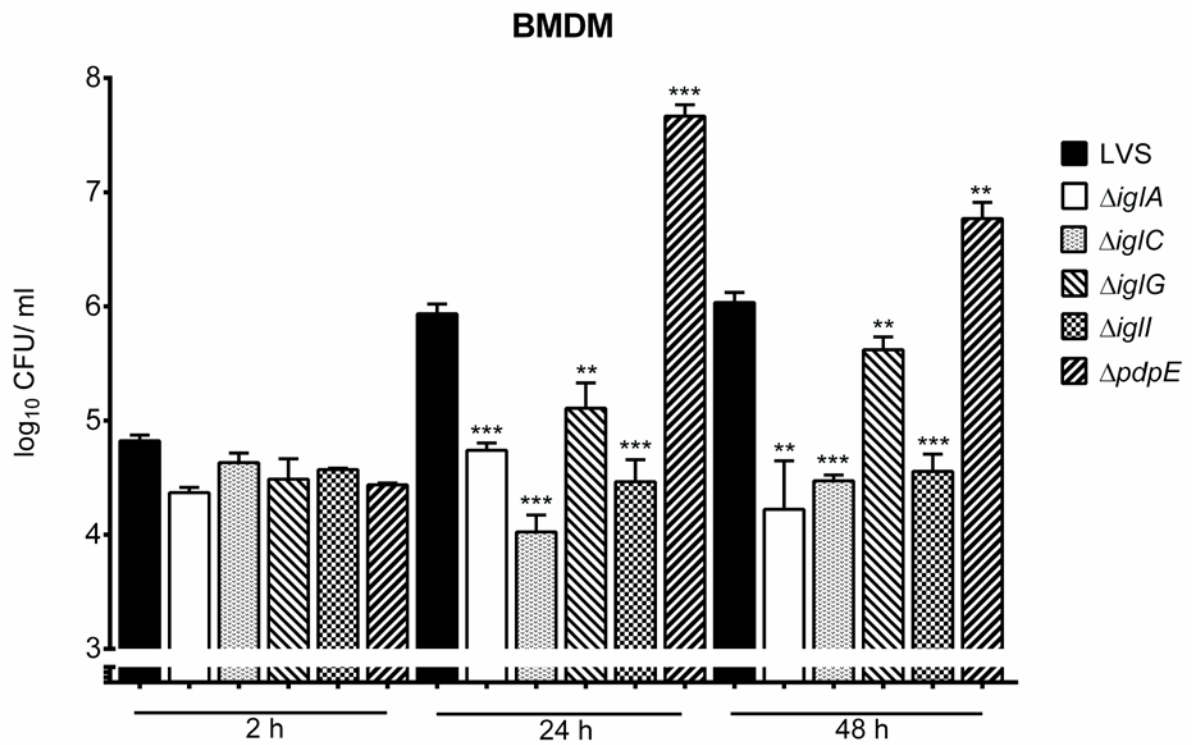

22

23

**Fig. S3.** Intracellular replication of indicated *F. tularensis* strains in BMDM. The bars indicate mean values of log<sub>10</sub> CFU/ml and the error bars the SD. Experiments were performed two times with triplicate or duplicate data sets, of which one representative experiment is shown. Asterisks indicate a significant difference between the log<sub>10</sub> number of the CFU of the mutant in comparison to the parental strain LVS, as determined by a 2-sided *t* test with equal variance (\*\*  $P \leq 0.01$ ; \*\*\*  $P \leq 0.001$ ).

29

Fig. S4

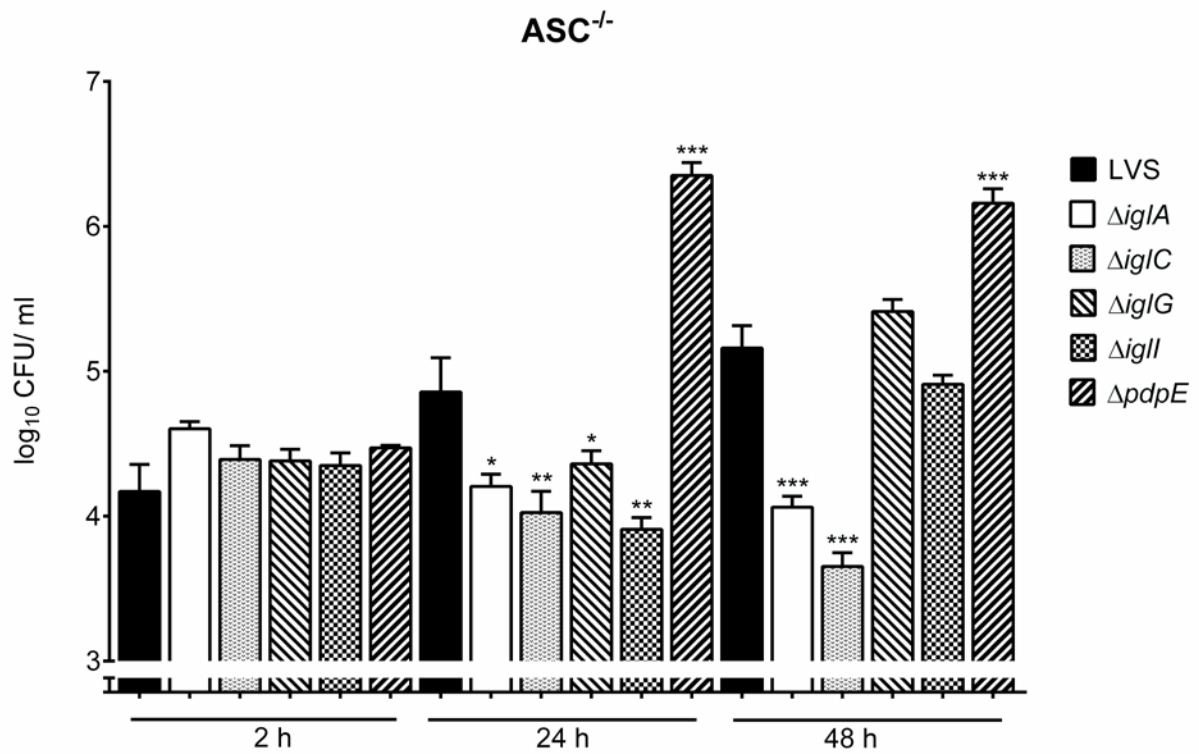

**Fig. S4.** Intracellular replication of indicated *F. tularensis* strains in ASC<sup>-/-</sup> BMDM. The bars indicate mean values of log<sub>10</sub> CFU/ml and the error bars the SD. Experiments were performed three times with triplicate or duplicate data sets, of which one representative experiment is shown. Asterisks indicate a significant difference between the log<sub>10</sub> number of the CFU of the mutant in comparison to the parental strain LVS, as determined by a 2-sided *t* test with equal variance (\*  $P \leq 0.05$ ; \*\*  $P \leq 0.01$ ; \*\*\*  $P \leq 0.001$ ).

Fig. S5

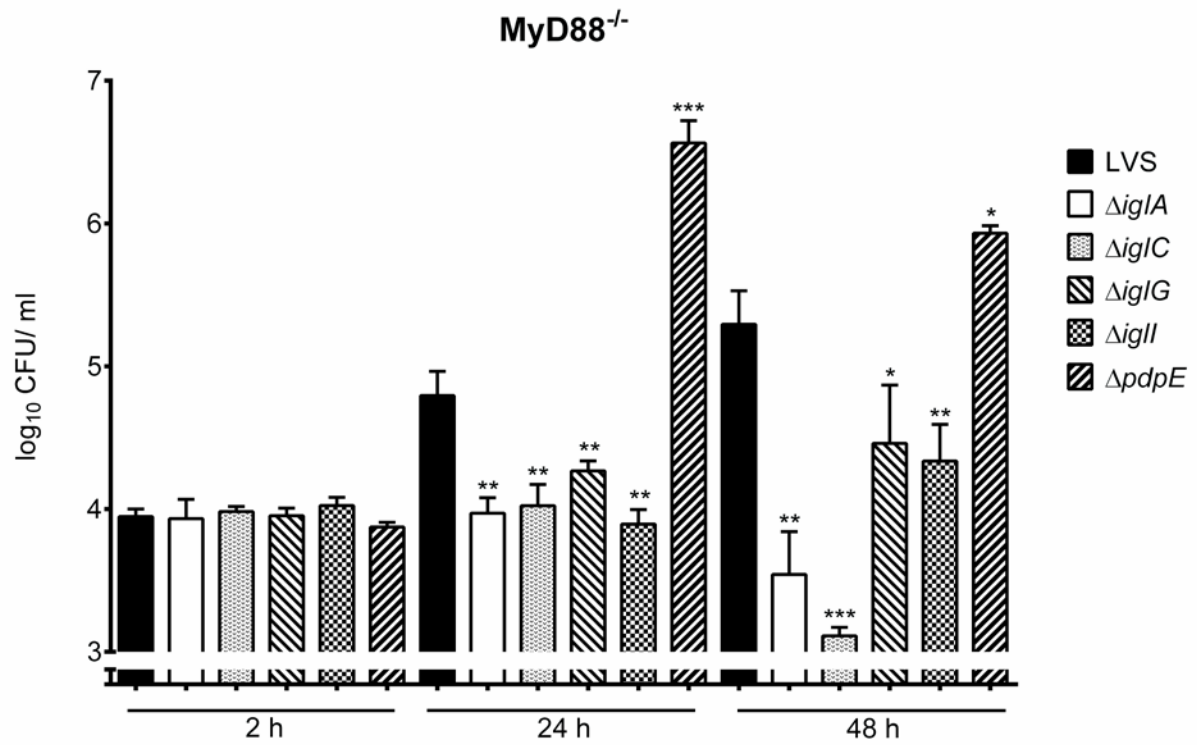

**Fig. S5.** Intracellular replication of indicated *F. tularensis* strains in MyD88<sup>-/-</sup> BMDM. The bars indicate mean values of log<sub>10</sub> CFU/ml and the error bars the SD. Experiments were performed three times with triplicate or duplicate data sets, of which one representative experiment is shown. Asterisks indicate a significant difference between the log<sub>10</sub> number of the CFU of the mutant in comparison to the parental strain LVS, as determined by a 2-sided *t* test with equal variance (\* *P* ≤ 0.05; \*\* *P* ≤ 0.01; \*\*\* *P* ≤ 0.001).

Fig. S6

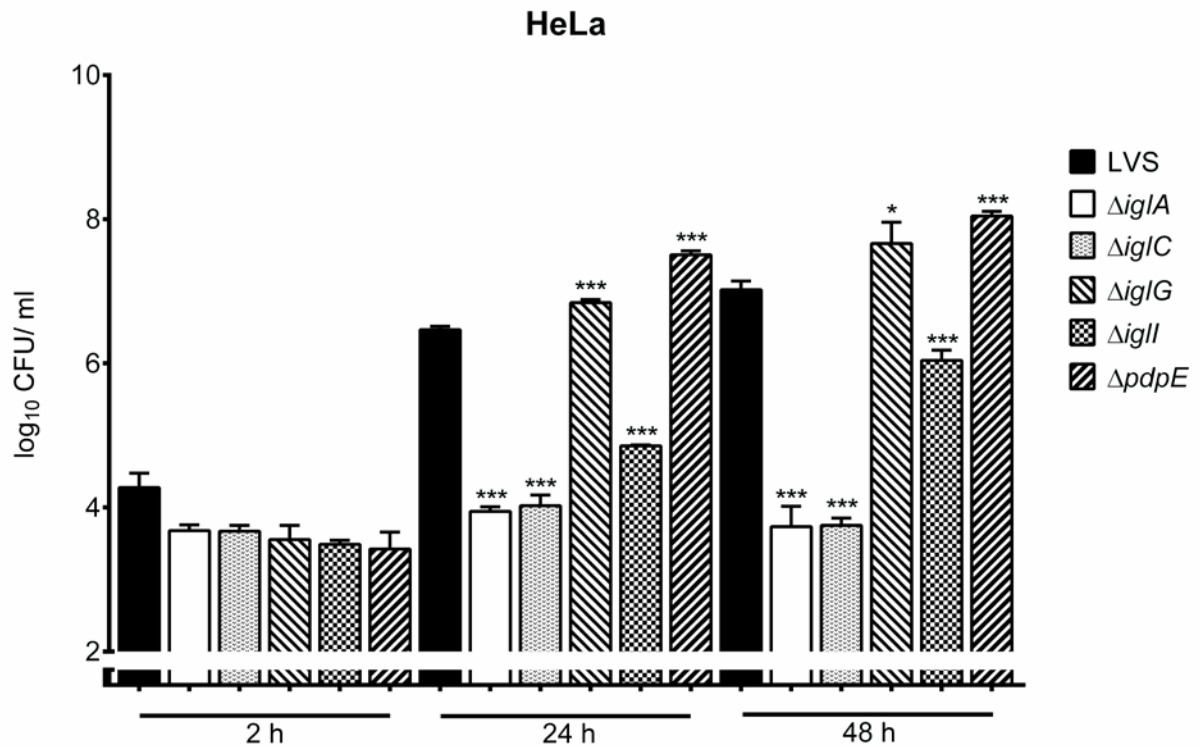

52

53

54 **Fig. S6.** Intracellular replication of indicated *F. tularensis* strains in HeLa cells. The bars indicate mean  
 55 values of log<sub>10</sub> CFU/ml and the error bars the SD. Experiments were performed two times with  
 56 triplicate or duplicate data sets, of which one representative experiment is shown. Asterisks indicate  
 57 a significant difference between the log<sub>10</sub> number of the CFU of the mutant in comparison to the  
 58 parental strain LVS, as determined by a 2-sided *t* test with equal variance (\*  $P \leq 0.05$ ; \*\*\*  $P \leq 0.001$ ).

59

60

61

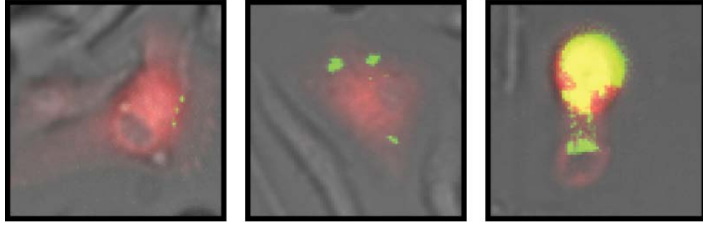

62

63

64 **Fig. S7.** Pictures representing cells microinjected with *F. tularensis* that fall into either of three  
65 categories; (A) 0 – 20, (B) 20 – 100 and (C) 100 - 1000 bacteria/cell.

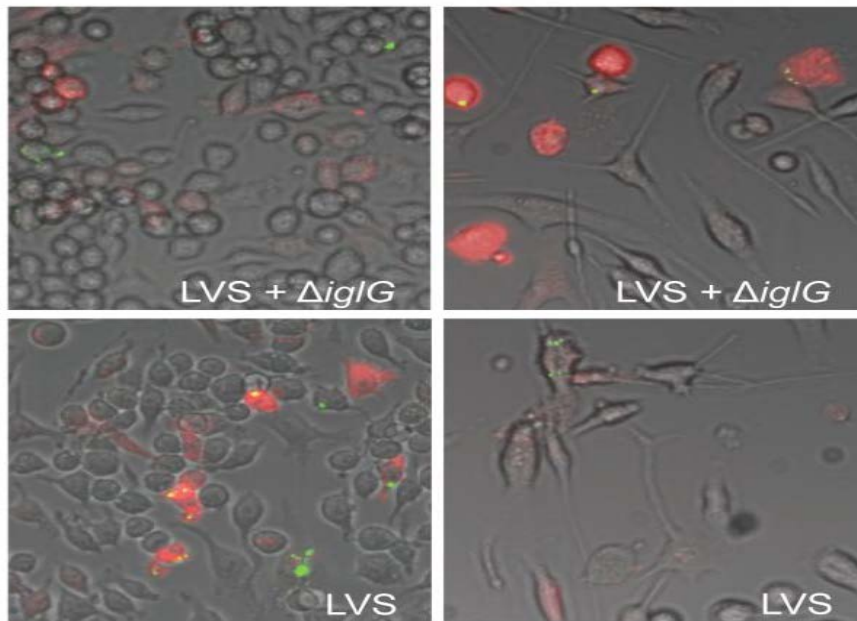

67

68

69 **Fig. S8.** Microinjection of J774 cells (left panels) or BMDM (right panels) with GFP-expressing LVS and  
70 non-labeled  $\DeltaiglG$  (top panels) or GFP-expressing LVS alone (bottom panels). Pictures were taken at  
71 24 h after injection with a live-cell imaging microscope equipped with an EMCCD camera. Co-  
72 localization of injected cells containing RD (red) and GFP expressing bacteria (green) resulted in  
73 yellow signals. Representative pictures from one of two independent experiments are shown.

74

Fig. S9

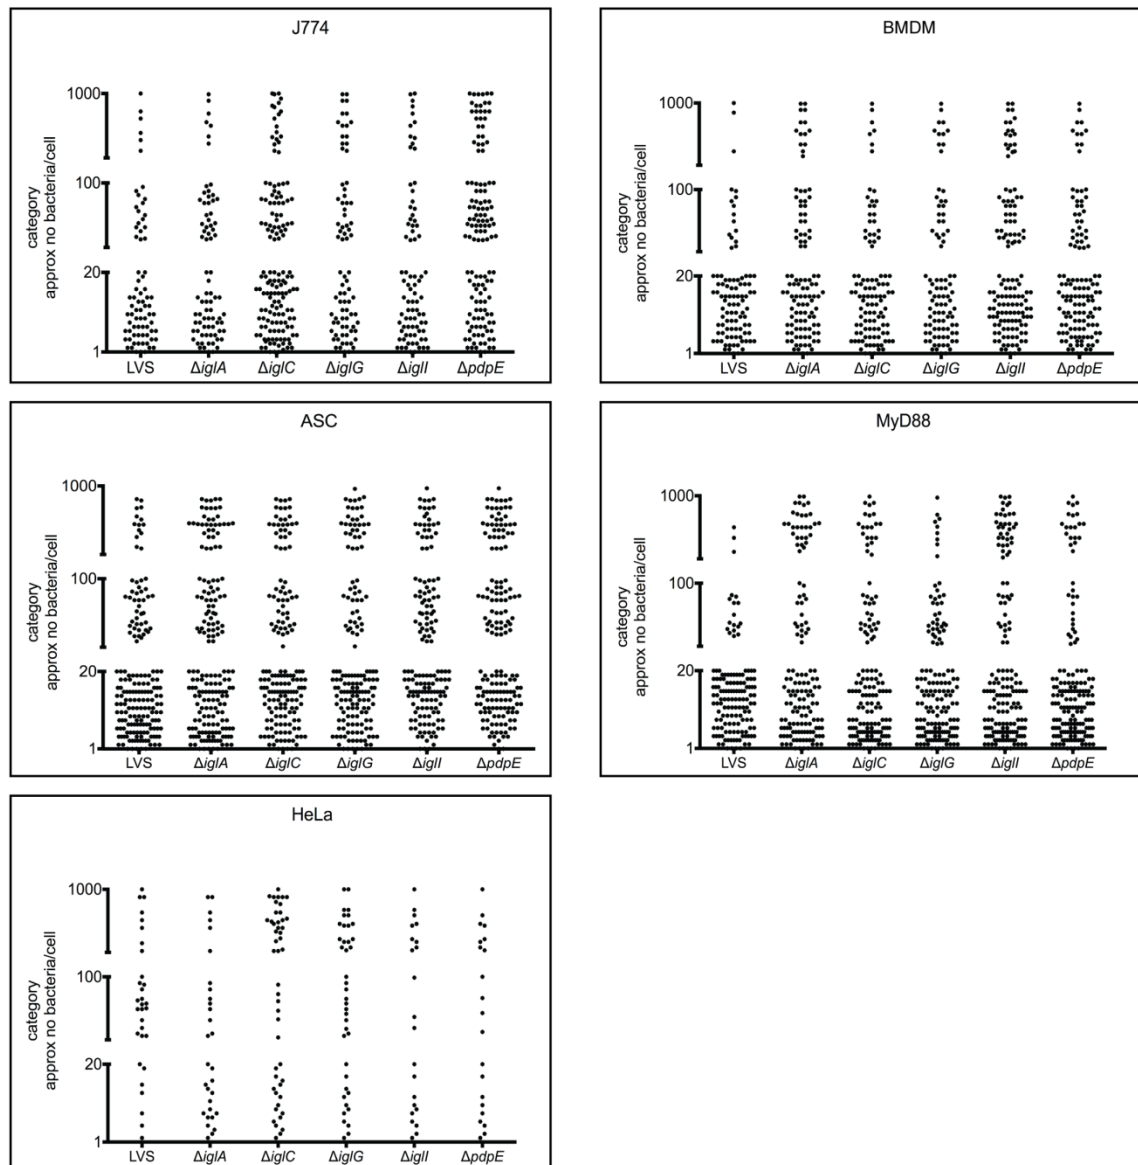

76

77 **Fig. S9. Numbers of *F. tularensis* at 24 h upon microinjection in indicated cell types.** Each cell  
 78 infected by injection is represented by a dot that is assigned to the corresponding category 0 – 20, 20  
 79 – 100, and 100 – 1000 bacteria per cell.

80
