# Supplementary material
Source: PubMed Central journal article supplement (PMC4496618)
Supplement: IAI.00416-15_zii999091340so2.pdf [file IAI.00416-15_zii999091340so2.pdf]

81 **Table S1. Strains used in this study**

| Strain                             | Characteristics              | Reference             |
|------------------------------------|------------------------------|-----------------------|
| <b>LVS</b>                         | Live vaccine strain          | USAMRIID <sup>a</sup> |
| <b><i>ΔiglA</i></b>                | LVS, <i>iglA</i> null mutant | (1)                   |
| <b><i>ΔiglC</i></b>                | LVS, <i>iglC</i> null mutant | (2)                   |
| <b><i>ΔiglG</i></b>                | LVS, <i>iglG</i> null mutant | (3)                   |
| <b><i>ΔiglI</i></b>                | LVS, <i>iglI</i> null mutant | (3)                   |
| <b><i>ΔpdpE</i></b>                | LVS, <i>pdpE</i> null mutant | (3)                   |
| <b><i>L. monocytogenes</i> EGD</b> | EGD wild type strain         | (4)                   |

82 <sup>a</sup> USAMRIID, U.S. Army Medical Research Institute of Infectious Diseases, Fort Detrick, Frederick, MD.

83

84 **References**

- 85 1. **Bröms JE, Lavander M, Sjöstedt A.** 2009. A conserved a-helix essential for a type VI  
86 secretion-like system of *Francisella tularensis*. J Bacteriol **191**:2431-2446.
- 87 2. **Lindgren H, Golovliov I, Baranov V, Ernst RK, Telepnev M, Sjöstedt A.** 2004. Factors affecting  
88 the escape of *Francisella tularensis* from the phagolysosome. J Med Microbiol **53**:953-958.
- 89 3. **Bröms JE, Lavander M, Meyer L, Sjöstedt A.** 2011. IglG and IglI of the *Francisella*  
90 pathogenicity island are important virulence determinants of *Francisella tularensis* LVS.  
91 Infect immun **79**:3683-3696.
- 92 4. **Mandin P, Fsihi H, Dussurget O, Vergassola M, Milohanic E, Toledo-Arana A, Lasa I,**  
93 **Johansson J, Cossart P.** 2005. VirR, a response regulator critical for *Listeria monocytogenes*  
94 virulence. Mol Microbiol **57**:1367-1380.

95

96
